# Supplementary material for: Fragility Fractures and Imminent Fracture Risk in the Spanish Population: A Retrospective Observational Cohort Study
Source: J Clin Med. 2021 Mar 5;10(5):1082. doi: 10.3390/jcm10051082 (PMC7961522; doi:10.3390/jcm10051082)
Supplement: Supplementary file 1 [file jcm-10-01082-s001.pdf]

**TITLE: ANALYSIS OF IMMINENT FRACTURE RISK IN THE SPANISH  
POPULATION: A RETROSPECTIVE OBSERVATIONAL COHORT STUDY.**

**SUPPLEMENTARY**

|                                                                                                                                 |   |
|---------------------------------------------------------------------------------------------------------------------------------|---|
| Supplementary Table S1. Fracture codes according to ICD-9.. ..                                                                  | 2 |
| Supplementary Table S2. Incidence rate of subsequent fracture events by type of index fracture and follow-up period (years). .. | 3 |
| Supplementary Table S3. Relative Risk of subsequent fracture events by age, sex and index fracture site. ....                   | 4 |

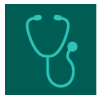

**Table S1.** Fracture codes according to ICD-9.

| Fracture                | ICD-9 code                                                     |
|-------------------------|----------------------------------------------------------------|
| Hip fracture            | 820.0, 820.2, 733.14                                           |
| Spine fracture          | 805.0, 805.2, 805.4, 805.8, 806.0, 806.2, 806.4, 806.8, 733.13 |
| Pelvic fracture:        | 808.0, 808.2, 808.4, 808.8                                     |
| Femur (thigh) fracture  | 821.0, 821.2, 733.15                                           |
| Humerus (arm) fracture: | 812.0, 812.2, 812.4, 733.1                                     |
| Wrist fracture          | 813.4, 733.12                                                  |

*ICD-9* 9th revision of the International Statistical Classification of Diseases and Related Health Problems

**Table S2.** Incidence rate of subsequent fracture events by type of index fracture and follow-up period (years).

|                         | N (at risk) | person-years | SsFxs | IR x 10000 PY | 95% CI           |
|-------------------------|-------------|--------------|-------|---------------|------------------|
| <b>Hip</b>              |             |              |       |               |                  |
| All follow-up           | 431         | 909.6        | 37    | 406.8         | (294.7 - 561.4)  |
| ≤1 year since 1st Fx    | 431         | 390.6        | 16    | 409.7         | (251.0 - 668.7)  |
| 1-2years since 1st Fx   | 368         | 354.3        | 12    | 338.7         | (192.4 - 596.5)  |
| >2years since 1st Fx    | 340         | 164.8        | 9     | 546.0         | (284.1 - 1049.4) |
| <b>Pelvis</b>           |             |              |       |               |                  |
| All follow-up           | 74          | 164.4        | 7     | 425.8         | (203.0 - 893.1)  |
| ≤1 year since 1st Fx    | 74          | 70.6         | 3     | 424.7         | (137.0 - 1316.8) |
| 1-2years since 1st Fx   | 67          | 64.6         | 3     | 464.1         | (149.7 - 1439.0) |
| >2years since 1st Fx    | 62          | 29.1         | 1     | 343.2         | (48.4 - 2436.5)  |
| <b>Vertebral</b>        |             |              |       |               |                  |
| All follow-up           | 94          | 219.5        | 8     | 364.5         | (182.3 - 728.9)  |
| ≤1 year since 1st Fx    | 94          | 92.1         | 0     | 0.0           | .                |
| 1-2years since 1st Fx   | 92          | 87.1         | 6     | 688.6         | (309.4 - 1532.8) |
| >2years since 1st Fx    | 84          | 40.3         | 2     | 496.7         | (124.2 - 1986.2) |
| <b>Proximal humerus</b> |             |              |       |               |                  |
| All follow-up           | 264         | 620.9        | 19    | 306.0         | (195.2 - 479.8)  |
| ≤1 year since 1st Fx    | 264         | 257.4        | 5     | 194.3         | (80.9 - 466.8)   |
| 1-2years since 1st Fx   | 253         | 246.6        | 11    | 446.1         | (247.1 - 805.6)  |
| >2years since 1st Fx    | 236         | 116.9        | 3     | 256.5         | (82.7 - 795.4)   |
| <b>Wrist</b>            |             |              |       |               |                  |
| All follow-up           | 506         | 1196.7       | 28    | 234.0         | (161.6 - 338.9)  |
| ≤1 year since 1st Fx    | 506         | 494.6        | 15    | 303.3         | (182.8 - 503.0)  |
| 1-2years since 1st Fx   | 483         | 471.7        | 10    | 212.0         | (114.1 - 394.1)  |
| >2years since 1st Fx    | 461         | 230.4        | 3     | 130.2         | (42.0 - 403.6)   |

Fx: index fracture. SsFx: subsequent fracture event. IR: incidence rate. PY: person year. CI: confidence interval.

**Table S3.** Relative Risk of subsequent fracture events among those with previous fracture compared with the general population by age, sex and index fracture site.

|                 | RR (95%CI)*      | p-value |
|-----------------|------------------|---------|
| All individuals | 1.80 (1.46-2.21) | <0.01   |
| Male            | 2.49 (1.39-4.45) | <0.01   |
| Female          | 1.73 (1.39-2.16) | <0.01   |
| 50-59years      | 2.67 (1.19-6.02) | 0.02    |
| 60-69years      | 1.56 (0.69-3.50) | 0.29    |
| 70-79years      | 2.56 (1.70-3.84) | <0.01   |
| 80+years        | 1.58 (1.21-2.05) | <0.01   |
| Hip             | 1.62 (1.15-2.27) | <0.01   |
| Pelvis          | 3.34 (1.83-6.08) | <0.01   |
| Vertebral       | 2.64 (1.36-5.14) | <0.01   |
| Prox. humerus   | 1.26 (0.68-2.31) | 0.47    |
| Wrist           | 1.83 (1.25-2.70) | <0.01   |

\*Adjusted RateRatio estimated using Poisson regression models that include age and sex as covariates
